# Supplementary material
Source: publisher figshare collection journal article supplement (https://tandf.figshare.com/ndownloader/files/19934972)
Supplement: Supplementary file 1 [file 19934972]

**Supplementary File**

**Pharmacokinetics and Brain targeting of Trans-Resveratrol loaded mixed micelles in rats following intravenous administration**

Roshan Katekara#, Ganeshkumar Thombreb#, Mohammed Riyazuddina, Athar Husaina, Hiral Rania, Kusuma Sushma Praveenab, Jiaur R. Gayena,c,*

*aPharmaceutics & Pharmacokinetics Division, CSIR-Central Drug Research Institute, Lucknow-226031, India*

*bDepartment of Pharmaceutics, National Institute of Pharmaceutical Education and Research, Raibarelly-229010, India.*

*cAcademy of Scientific and Innovative Research (AcSIR), New Delhi, India.*

#Equal contribution

*Correspondence to: Jiaur R. Gayen, Senior Scientist, Pharmaceutics & Pharmacokinetics Division, CSIR-Central Drug Research Institute, Sector-10, Jankipuram Extension, Sitapur Road, Lucknow, India‐226031. E-mail: [jr.gayen@cdri.res.in](mailto:jr.gayen@cdri.res.in)

**
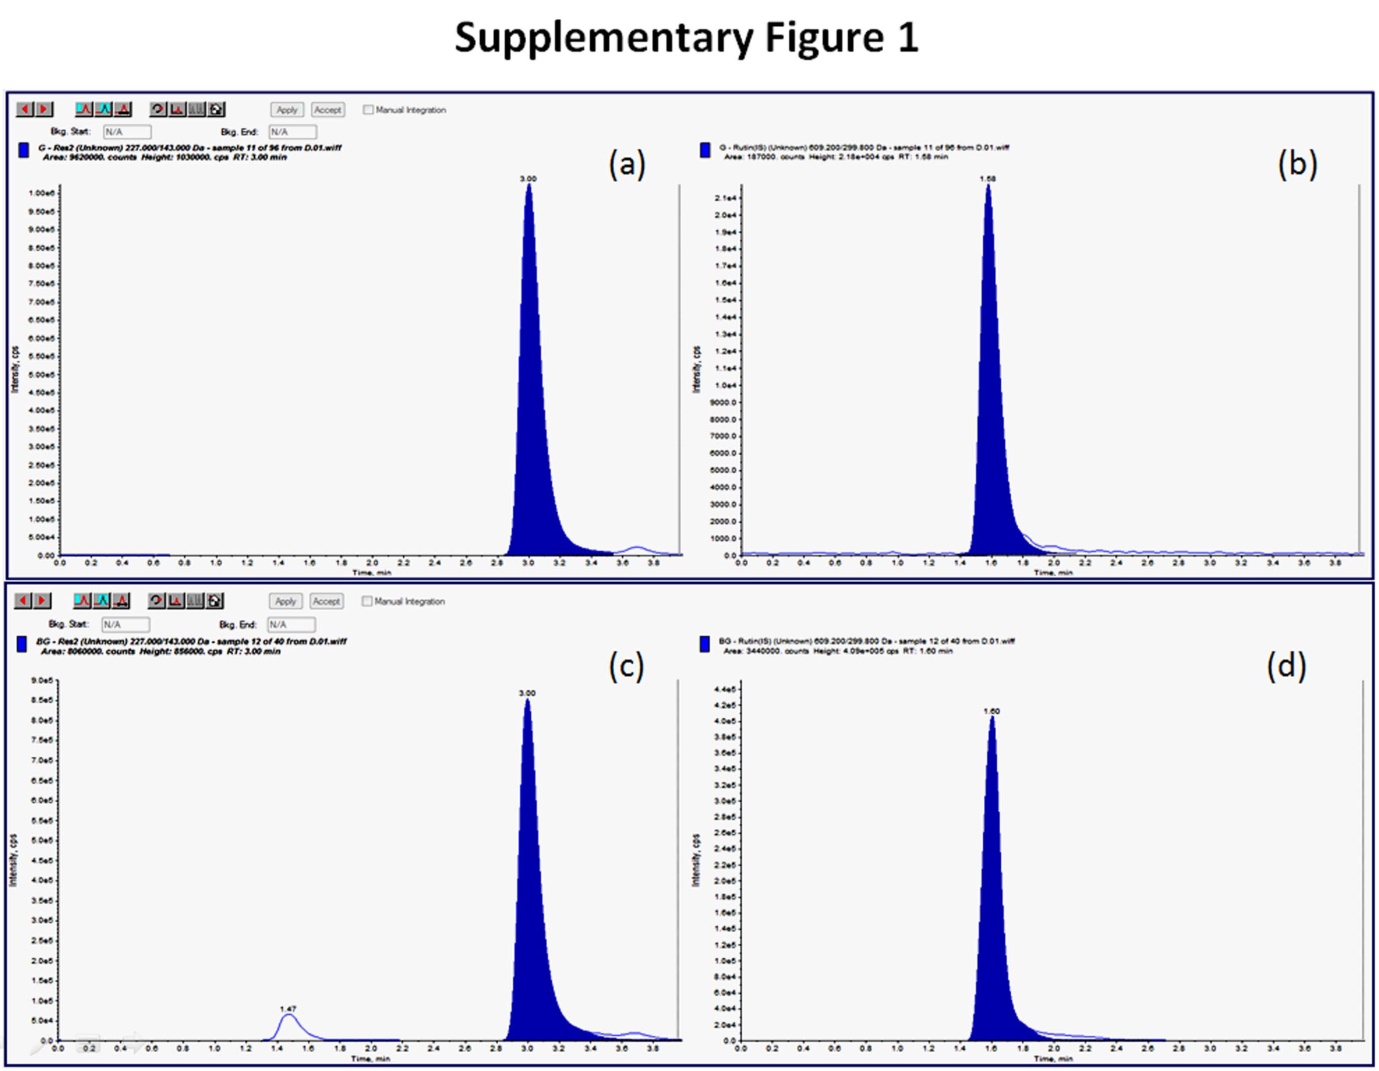
**

**Supplementary Figure 1:** HPLC-MS chromatograms for estimation of T-RES from (a) blood and (c) brain; And (b) & (d) are profile of internal standard (rutin) in blood & brain samples, respectively.
